# Supplementary material for: The MRX Complex Ensures NHEJ Fidelity through Multiple Pathways Including Xrs2-FHA–Dependent Tel1 Activation
Source: PubMed Central journal article supplement (PMC4798412; doi:10.1371/journal.pgen.1005942), 2016-03-18

**A**

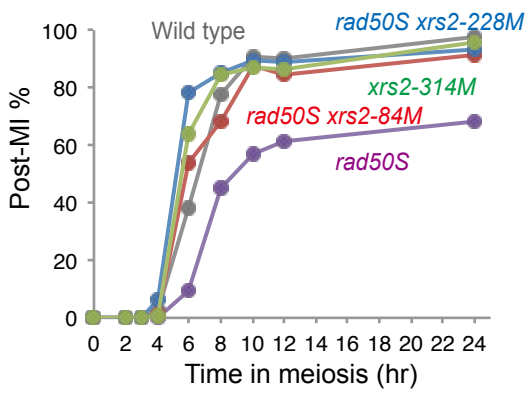

**B**

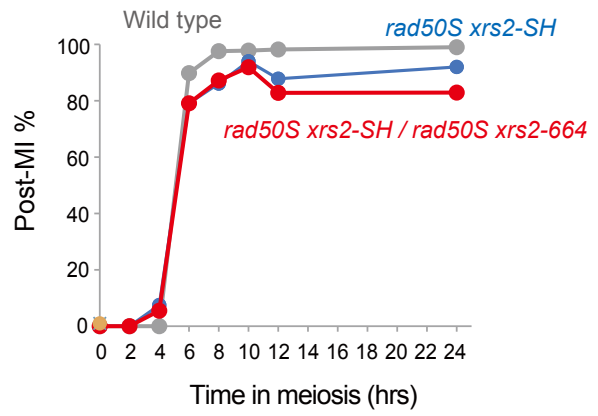

Supplement: pgen.1005942.s003.pdf [file pgen.1005942.s003.pdf]
